# Supplementary material for: Hexagonal sheet-like mesoporous titanium phosphate for highly efficient removal of lead ion from water
Source: Royal Society of Chemistry journal article supplement (doi:10.1039/c6ra12700b), 2016-01-01
Supplement: c6ra12700b1.pdf [file c6ra12700b1.pdf]

### Electronic Supporting Information (ESI):

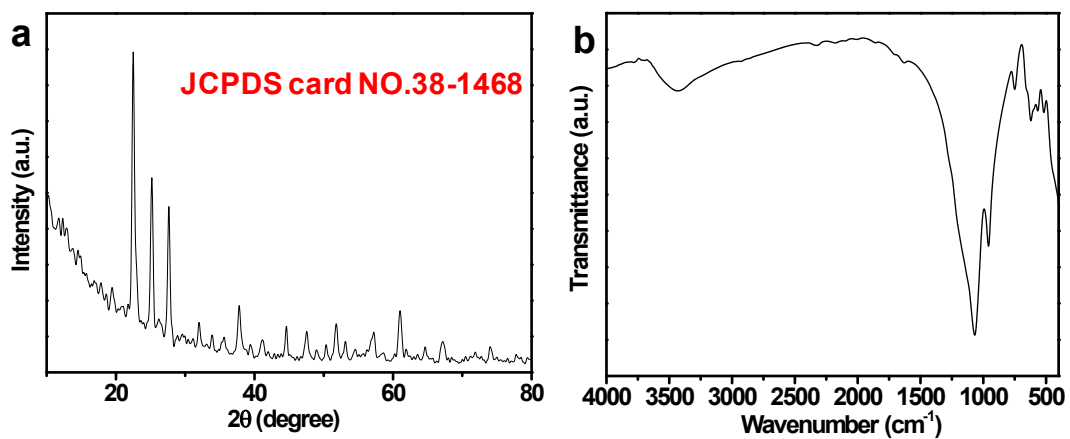

Fig. S1: (a) XRD and (b) FTIR spectra of the 700°C-treated sample (TiP<sub>2</sub>O<sub>7</sub>)

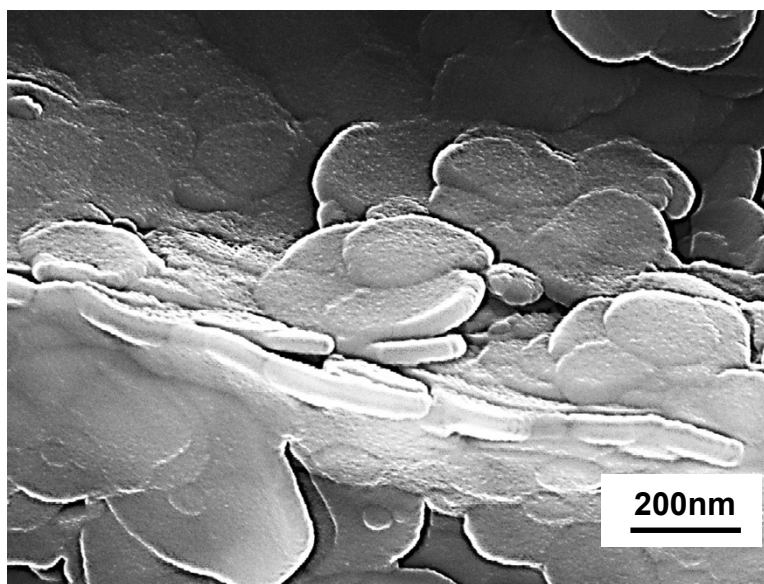

Fig.S2: FESEM image (magnified) of the sample

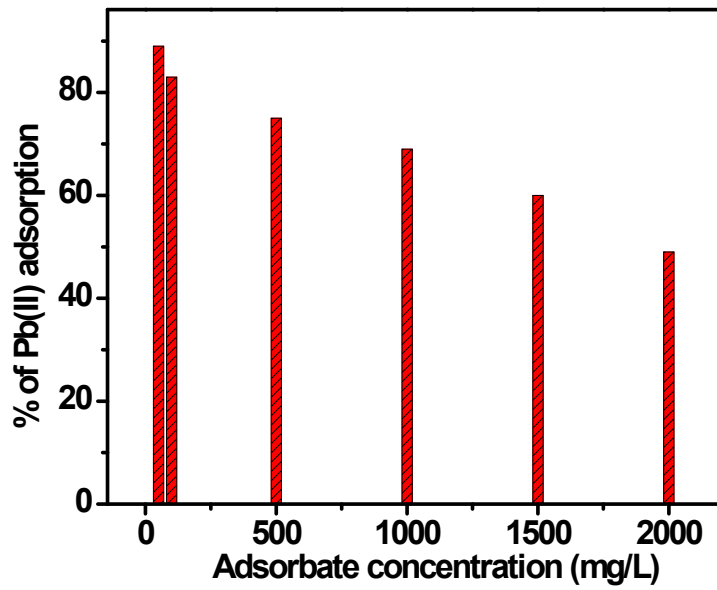

Fig. S3: % of Pb(II) adsorption with different adsorbate concentration in 5 mins.

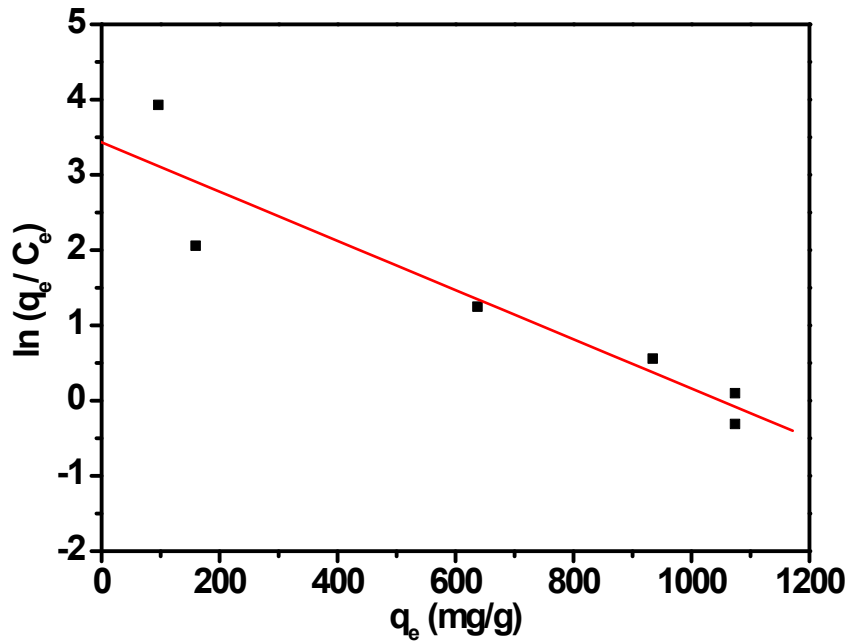

Fig. S4: The plot of  $\ln(q_e/C_e)$  Vs.  $q_e$  of Pb(II) ion adsorption on the sample

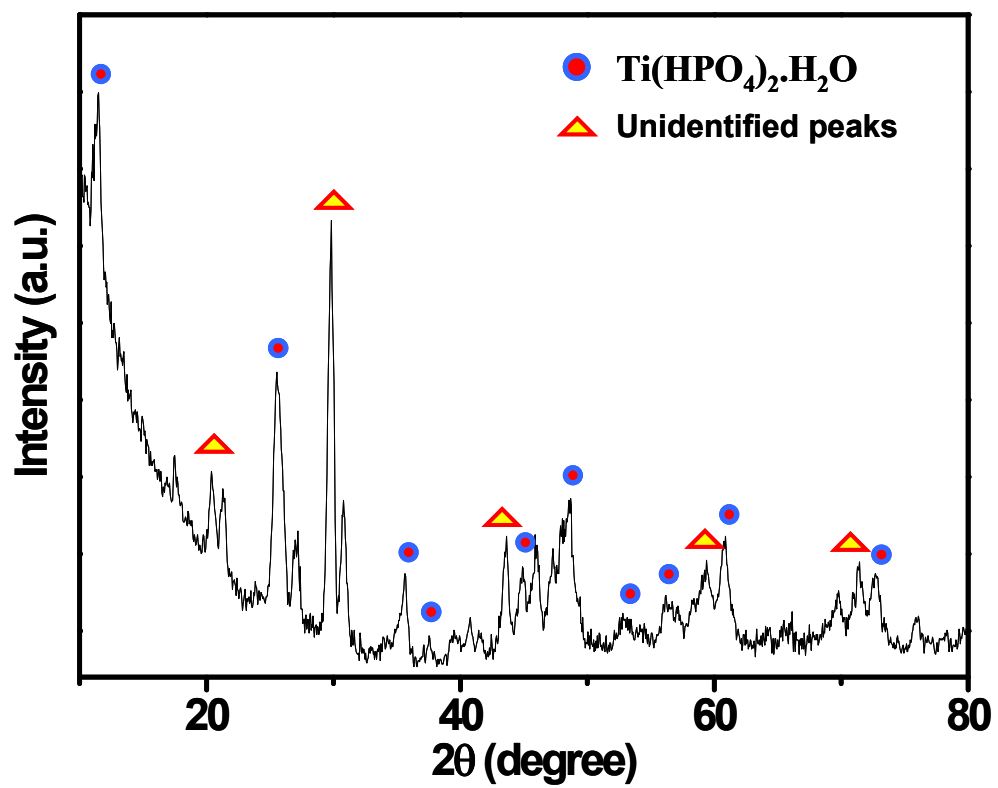

Fig. S5: The XRD plot of the sample after adsorption of Pb(II)
